# Supplementary material for: Mn-Doped CsPbCl3perovskite nanocrystals: solvothermal synthesis, dual-color luminescence and improved stability
Source: Royal Society of Chemistry journal article supplement (doi:10.1039/c8tc03139h), 2018-01-01
Supplement: c8tc03139h1.pdf [file c8tc03139h1.pdf]

## Electronic Supporting Information

### **Mn-Doped CsPbCl<sub>3</sub> Perovskite Nanocrystals: Solvothermal Synthesis, Dual-Color Luminescence and Improved Stability**

**Daqin Chen**<sup>1,2,\*</sup>, **Gaoliang Fang**<sup>2</sup>, **Xiao Chen**<sup>2</sup>, **Lei Lei**<sup>3,\*</sup>, **Jiasong Zhong**<sup>2</sup>, **Qinan Mao**<sup>2</sup>, **Su Zhou**<sup>2</sup>, **Junni Li**<sup>2</sup>

<sup>1</sup>College of Physics and Energy, Fujian Normal University, Fuzhou, Fujian, 350117, P. R. China

<sup>2</sup>College of Materials & Environmental Engineering, Hangzhou Dianzi University, Hangzhou, Zhejiang, 310018, P. R. China

<sup>3</sup>College of Materials Science and Engineering, China Jiliang University, Hangzhou, Zhejiang, 310018, P. R. China

**\*Corresponding authors**

E-Mail: [dqchen@fjnu.edu.cn](mailto:dqchen@fjnu.edu.cn); [leilei@cjljlu.edu.cn](mailto:leilei@cjljlu.edu.cn)

**Table S1** Determination of Cs, Pb, Mn and Cl mole contents from EDX data for the Mn-doped CsPbCl<sub>3</sub> NCs with different Mn-to-Pb feeding ratios (0:1, 2:1, 6: 1, 10: 1).

|      | Cs    | Pb    | Mn    | Cl    | Cs: (Pb+Mn): Cl | Mn: (Pb+Mn) |
|------|-------|-------|-------|-------|-----------------|-------------|
| 0:1  | 0.234 | 0.245 |       | 0.711 | 1: 1.05: 3.04   | 0           |
| 2:1  | 0.259 | 0.221 | 0.002 | 0.791 | 1: 0.86: 3.05   | 0.01        |
| 6:1  | 0.252 | 0.196 | 0.073 | 0.821 | 1:1.07: 3.26    | 0.27        |
| 10:1 | 0.278 | 0.178 | 0.114 | 0.815 | 1: 1.05: 2.93   | 0.39        |

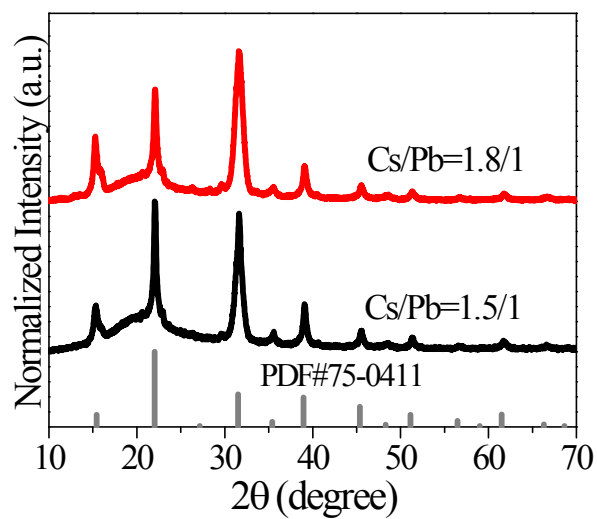

**Figure S1** XRD patterns of samples prepared with high Cs-to-Pb feeding ratio (1.5:1 and 1.8:1) and fixed Mn-to-Pb feeding ratio of 6:1.

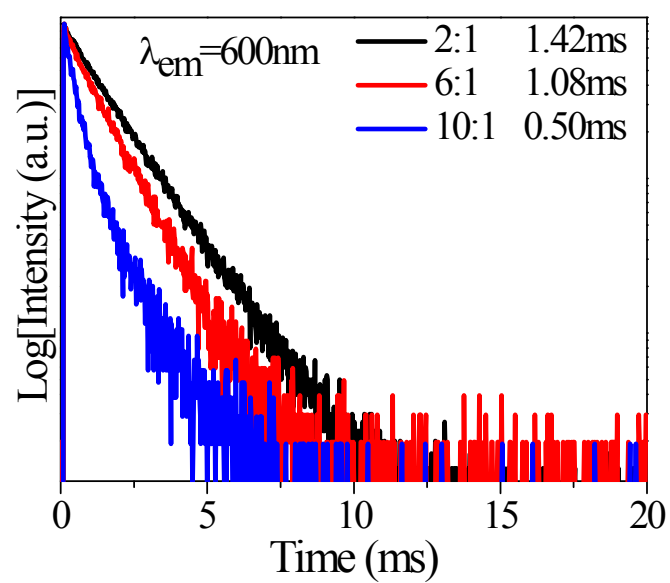

**Figure S2** PL decay curves of Mn<sup>2+</sup> luminescence ( $\lambda_{em}=600$  nm, assigned to Mn<sup>2+</sup>: <sup>4</sup>T<sub>1</sub>→<sup>6</sup>A<sub>1</sub> transition) in the Mn-doped CsPbCl<sub>3</sub> NCs synthesized with different Mn-to-Pb feeding ratios (2:1, 6: 1, 10: 1).

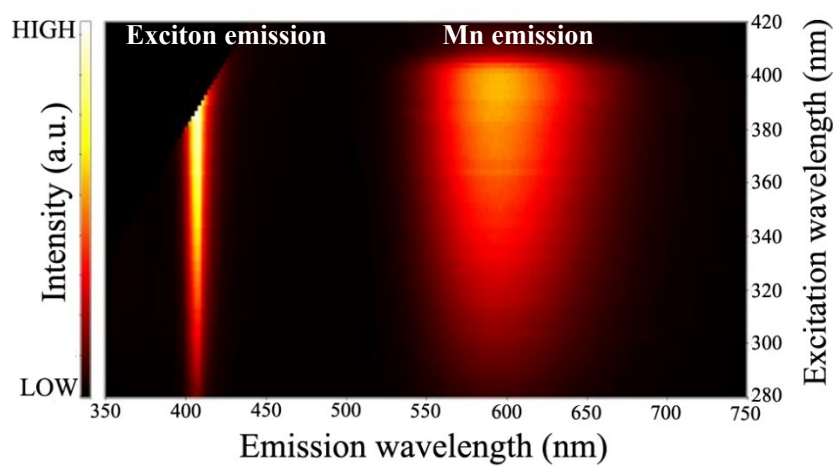

**Figure S3** Excitation-emission mapping for the as-prepared Mn-doped CsPbCl<sub>3</sub> NCs, showing the excitation wavelength independent emissions for both exciton and Mn<sup>2+</sup>.

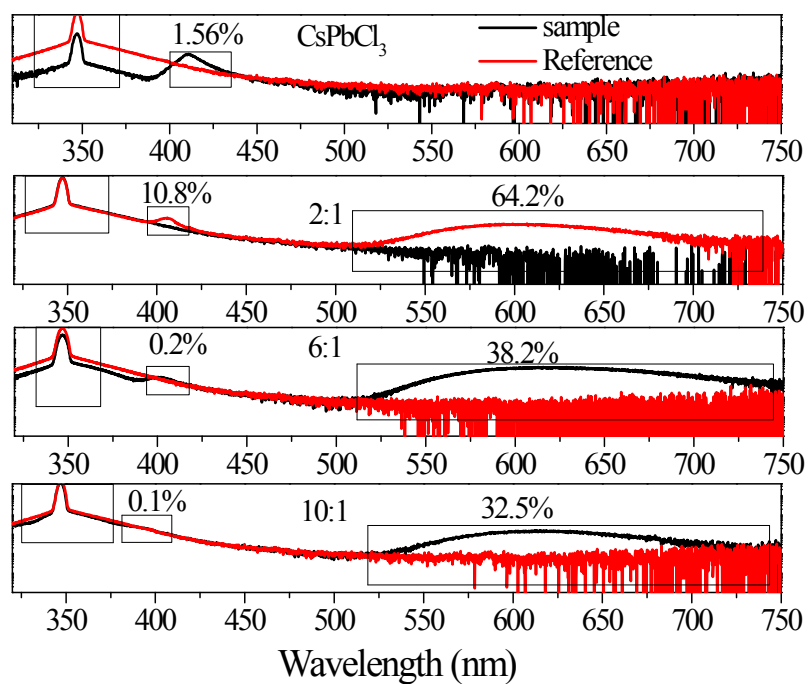

**Figure S4** Quantitative excitation and emission spectra ( $\lambda_{\text{ex}}=345$  nm) of the reference and Mn-doped CsPbCl<sub>3</sub> NCs with different Mn-to-Pb feeding ratio recorded by a spectrofluorometer equipped with an integrating sphere for PLQY measurement.

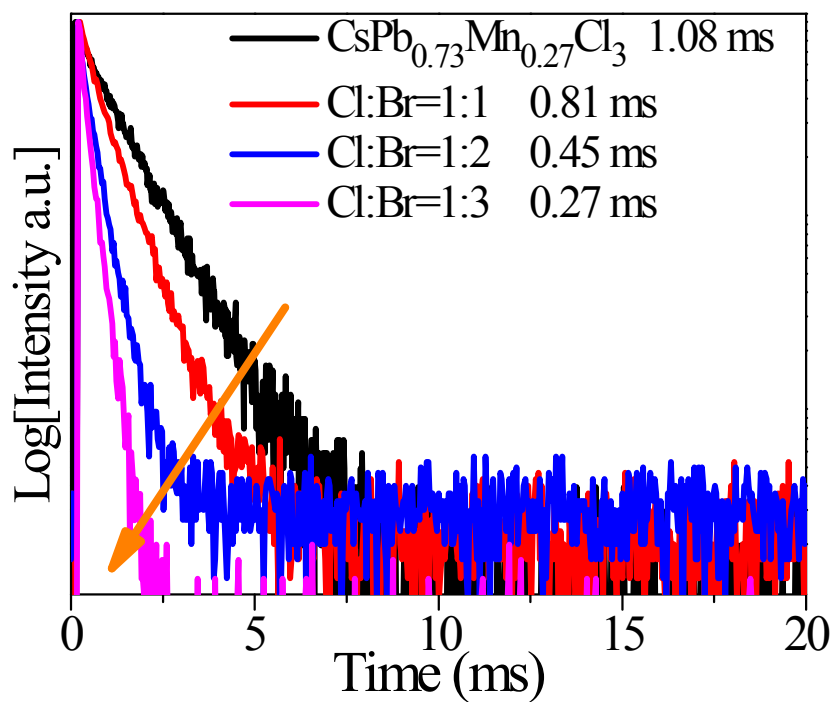

**Figure S5** PL decay curves of Mn<sup>2+</sup> luminescence in Mn-doped CsPb(Cl/Br)<sub>3</sub> NCs prepared via Cl-to-Br anion exchange.

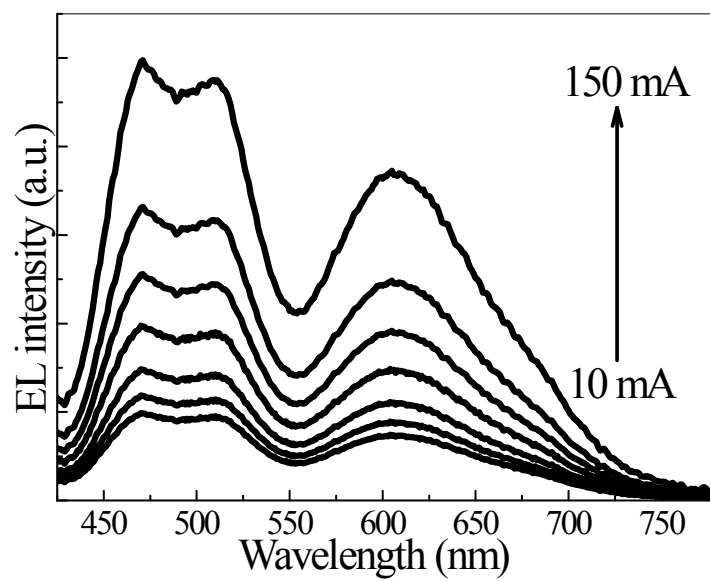

**Figure S6** EL spectra of WLED as a function of operating current.



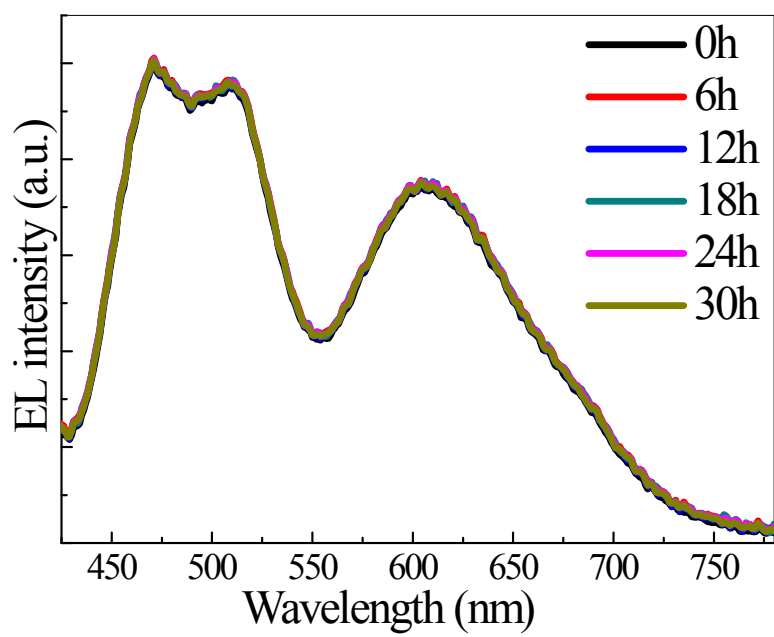

**Figure S7** EL spectra of WLED as a function of different working time intervals.

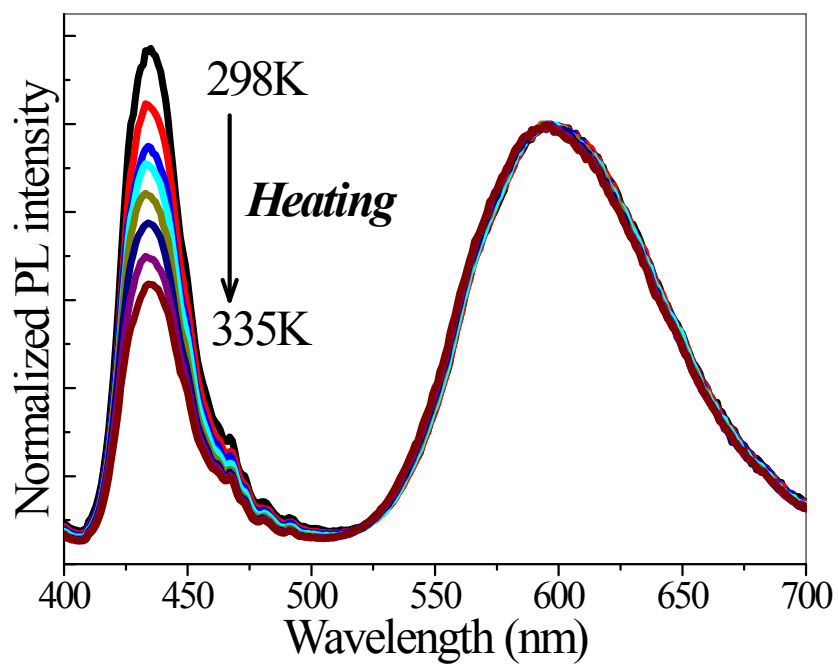

**Figure S8** PL spectra of Mn-doped CsPb(Cl/Br)<sub>3</sub> NCs recorded with elevation of temperature from 298 K to 335 K.

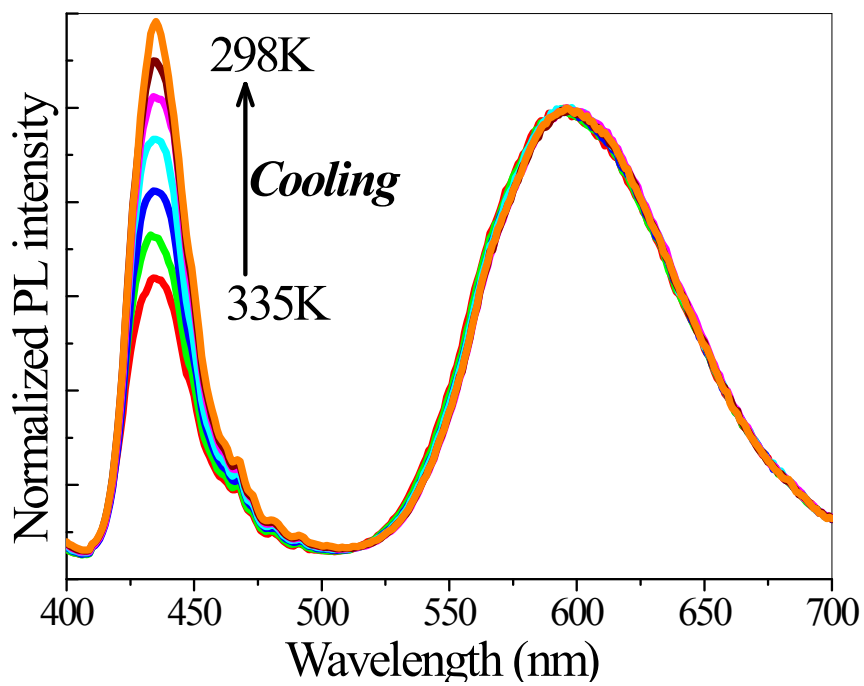

**Figure S9** PL spectra of Mn-doped CsPb(Cl/Br)<sub>3</sub> NCs recorded with decrease of temperature from 335 K to 298 K.

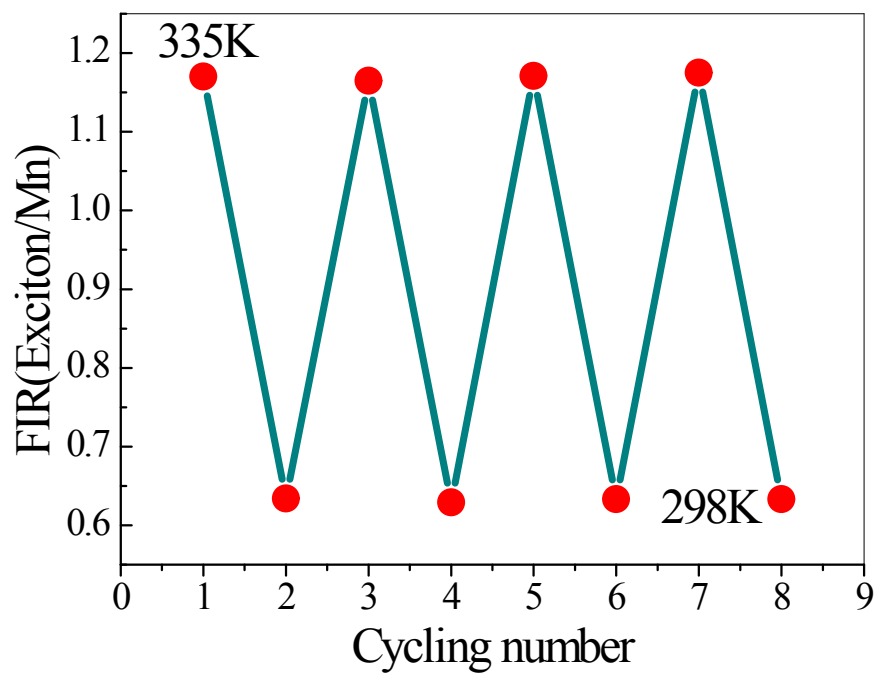

**Figure S10** Temperature-induced switching of FIR between exciton emission and Mn one (alternating between 335 K and 298 K).
